# Supplementary material
Source: publisher figshare collection journal article supplement (https://gsapubs.figshare.com/ndownloader/files/22397799)
Supplement: Supplementary file 1 [file 22397799]

| SUPPLEMENTAL TABLE 2. VOLUME, H/L, AREA AND LENGTH MEASUREMENTS OBTAINED FROM THE LITERATURE FOR SELECTED ROCKSLIDE AVALANCHES | | | | |
| --- | --- | --- | --- | --- |
|  | | | | |
|  | V (km3) | H/L | A (km2) | L (km) |
| Compressive |  |  |  |  |
| Chaos Jumbles 3 | 0.026 | 0.148 | 2.43 | 2.91 |
| Mombacho North | 1.25 | 0.11 | 56.8 | 11.9 |
| Carlson | 0.1 | 0.17 | 5.2 | 4.4 |
| Martinez Mountain | 0.24 | 0.197 | 10.36 | 7.9 |
| Blackhawk | 0.3 | 0.13 | 14 | 9 |
| Ollagüe | 1 | 0.166667 | 50 | 12 |
| Flims | 12 | 0.133 | 40 | 16 |
| Iriga | 1.5 | 0.097 | 65 | 11 |
|  |  |  |  |  |
| Extensive |  |  |  |  |
| Sherman | 0.03 | 0.22 | 8.22 | 5 |
| Socompa | 17 | 0.86 | 480 | 35 |
| Galunggung | 2.9 | 0.076 | 175 | 25 |
| Mombacho South | 1.75 | 0.1 | 49.5 | 12.4 |
| Lastarria | 0.091 | 0.149 | 9.3 | 6.7 |
| Aucanquilcha | 1 | 0.12 | 59 | 17 |
| Parinacota | 6 | 0.08 | 156 | 22 |
| *Note: V—* volume, *H–*fall height*, L—*horizontal runout, *A—*area. | | | | |
